# Supplementary material for: Center-driven and Clinically Driven Variation in US Liver Transplant Maintenance Immunosuppression Therapy: A National Practice Patterns Analysis
Source: PubMed Central journal article supplement — Transplant Direct. 2018 Jun 13;4(7):e364. doi: 10.1097/TXD.0000000000000800 (PMC6056277; doi:10.1097/txd.0000000000000800), 2018-06-13
Supplement: txd-4-e364-s0001.pdf [file txd-4-e364-s0001.pdf]

**Figure S1.** Maintenance immunosuppression in patients 7-12 months post liver transplant compared with regimen 0-6 months posttransplant.

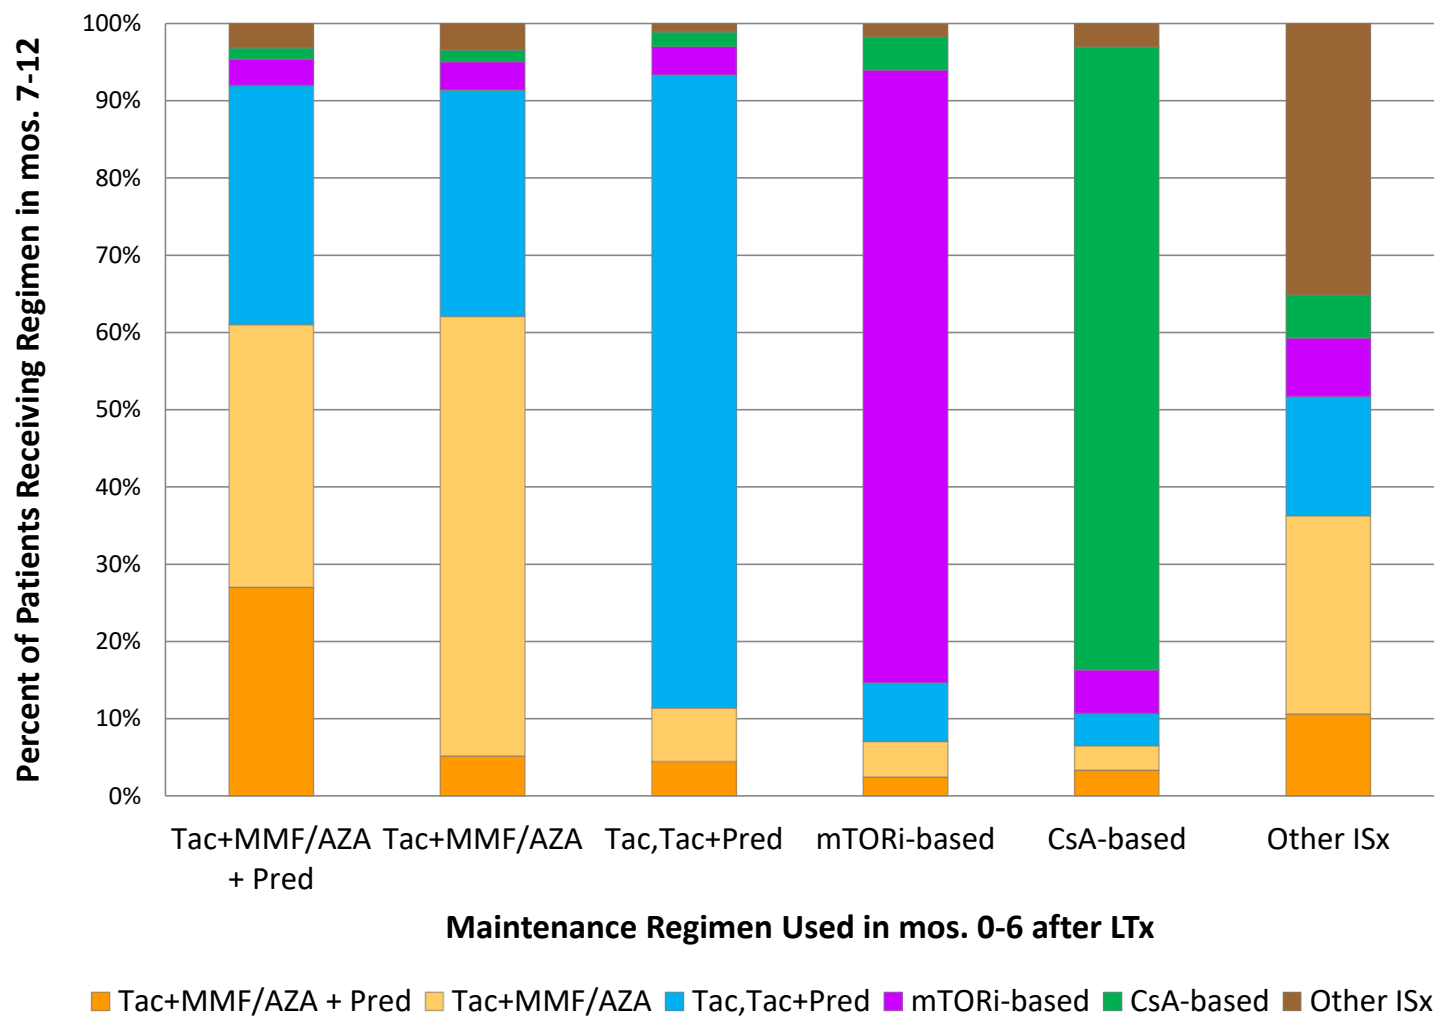

**Figure S2.** Proportion of patients receiving each maintenance immunosuppression option in months 7-12 after liver transplant across US centers (2006-2014). Each horizontal bar represents an individual center within US regions ordered by the proportion of patients receiving each regimen.

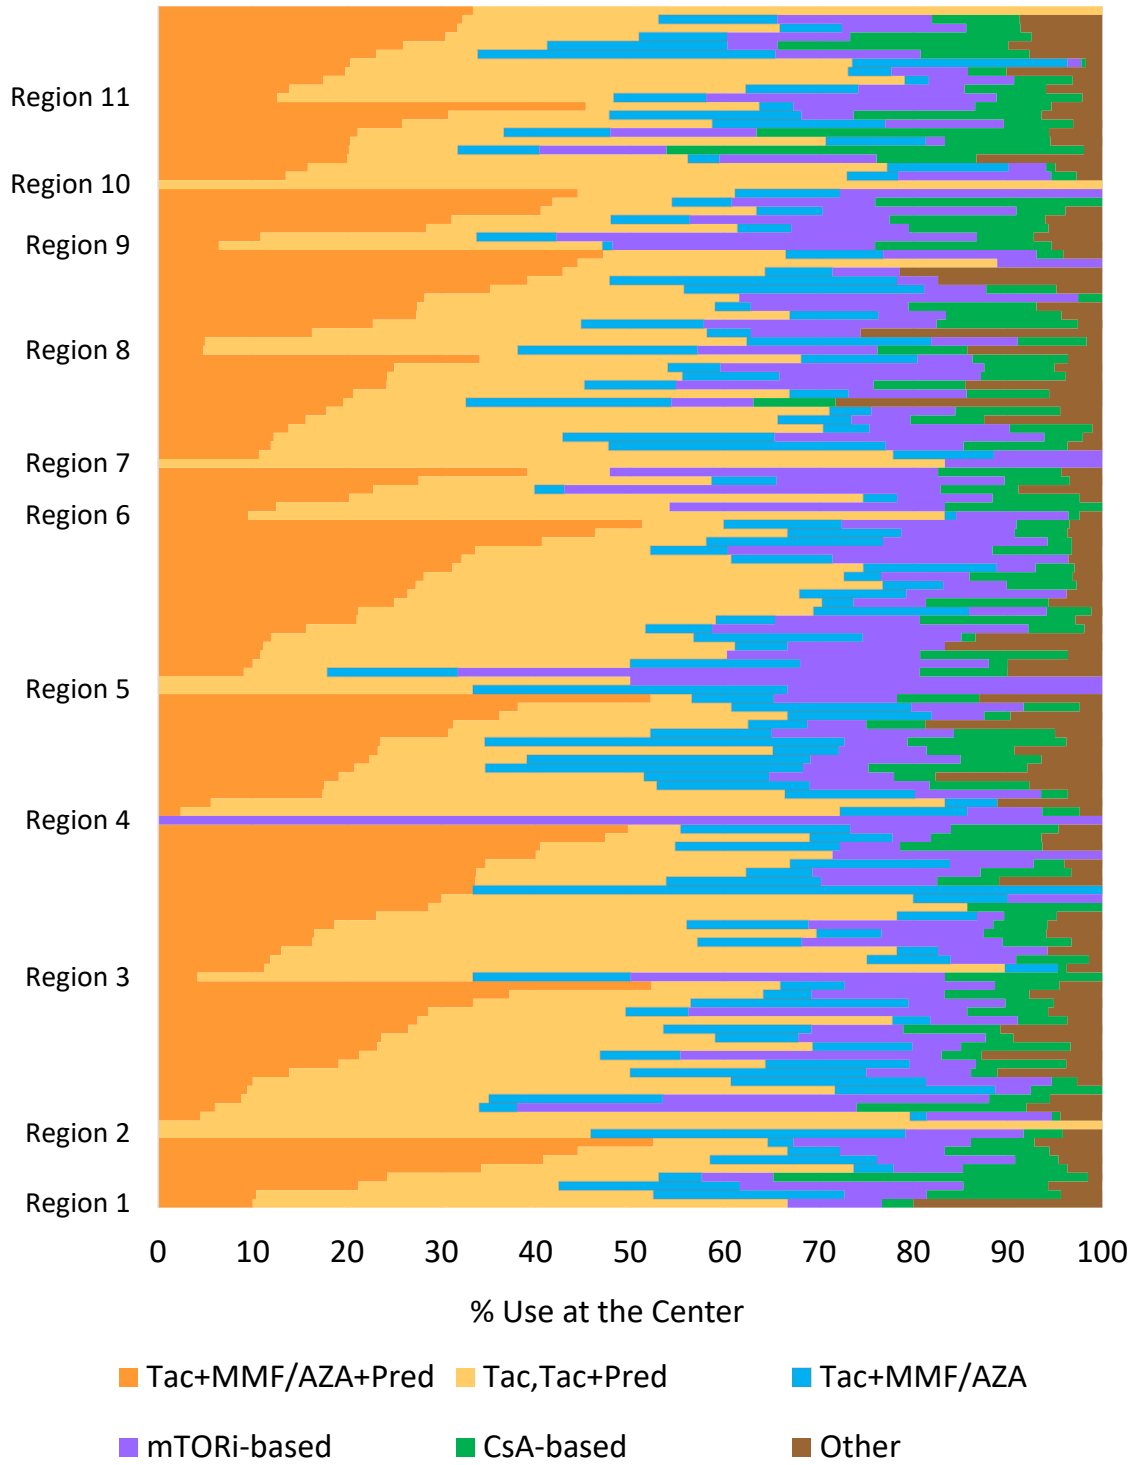

**Figure S3.** Empirical Bayes estimates for likelihood of use of each maintenance immunosuppression regimen compared with triple therapy in months 7-12 after liver transplant.

### Adjusted Center-level Rates of Maintenance Regimen vs. Reference Regimen Empirical Bayes Estimates

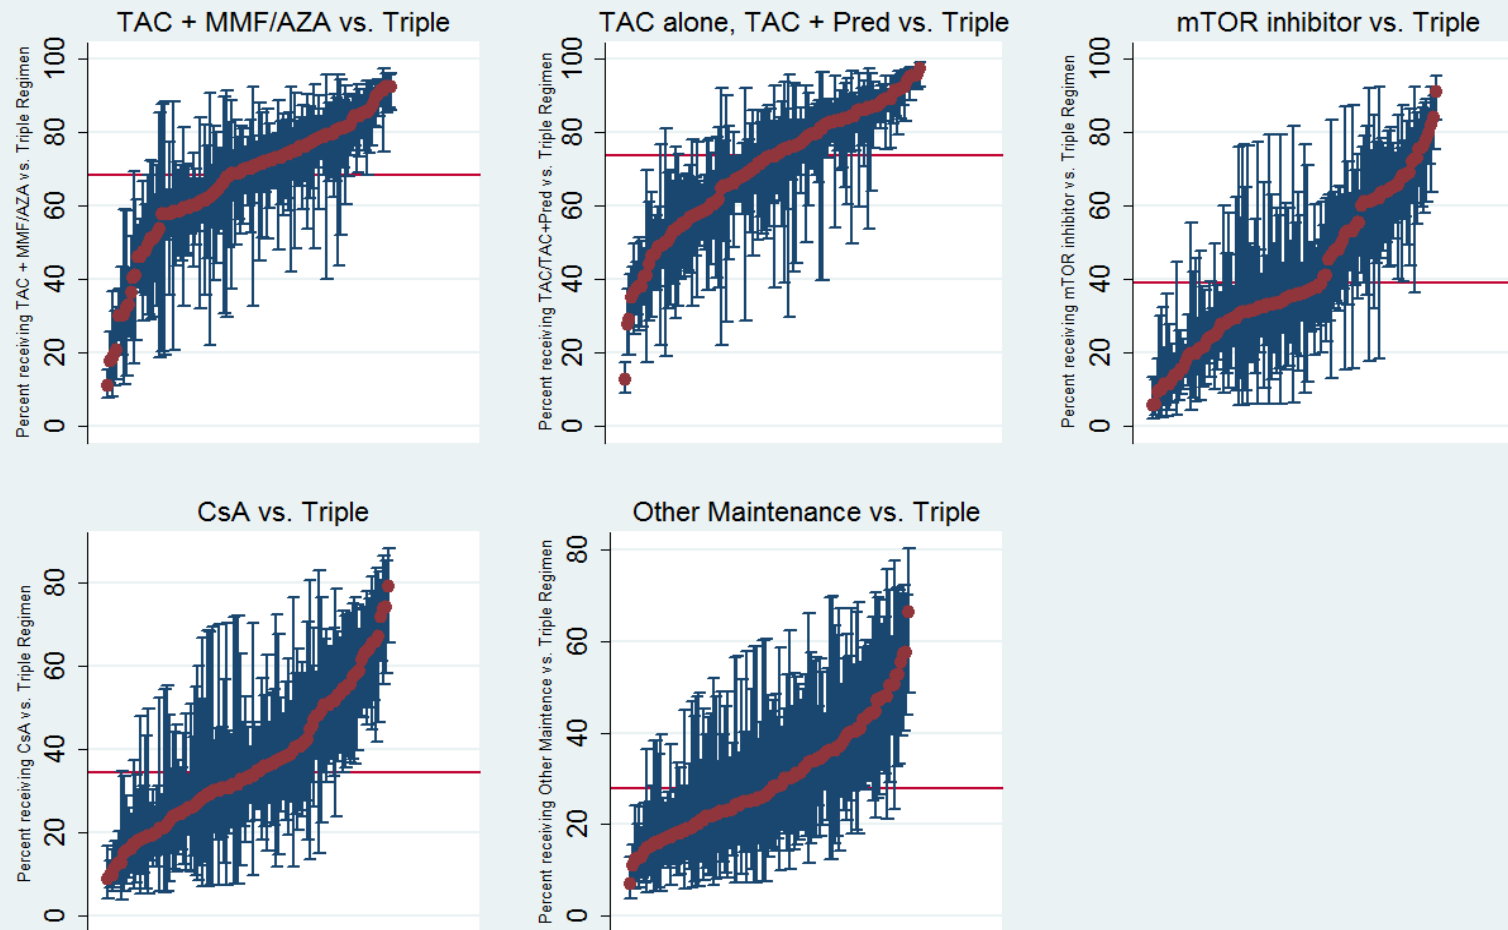

**Table S1.** Associations of recipient, donor, and transplant case characteristics with liver transplant maintenance immunosuppression regimen use in months 7-12 posttransplant compared with triple therapy (reference regimen)

|                                 | <b>Tac + MMF/MPA</b> | <b>Tac alone,<br/>Tac + Pred</b> | <b>mTORi-based</b> | <b>CsA-based</b>  | <b>Other ISx<br/>Maintenance</b> |
|---------------------------------|----------------------|----------------------------------|--------------------|-------------------|----------------------------------|
| <b>Induction regimen</b>        |                      |                                  |                    |                   |                                  |
| No induction                    | 0.98 (0.82,1.16)     | 1.00 (0.84,1.18)                 | 0.76 (0.61,0.94)*  | 0.99 (0.80,1.22)  | 0.93 (0.72,1.22)                 |
| Thymoglobulin                   | 1.05 (0.75,1.48)     | 1.12 (0.81,1.54)                 | 1.11 (0.75,1.65)   | 0.96 (0.64,1.44)  | 1.00 (0.61,1.62)                 |
| IL-2 receptor antibody          | Reference            | Reference                        | Reference          | Reference         | Reference                        |
| <b>Alemtuzumab</b>              | 0.91 (0.32,2.59)     | 2.96 (1.14,7.71)*                | 1.25 (0.39,4.07)   | 0.69 (0.17,2.71)  | 0.91 (0.24,3.48)                 |
| Other induction                 | 0.95 (0.52,1.73)     | 1.07 (0.61,1.87)                 | 1.64 (0.78,3.48)   | 1.07 (0.54,2.13)  | 1.21 (0.52,2.82)                 |
| <b>Recipient characteristic</b> |                      |                                  |                    |                   |                                  |
| Recipient age, years            |                      |                                  |                    |                   |                                  |
| 19 to 30                        | Reference            | Reference                        | Reference          | Reference         | Reference                        |
| 31 to 45                        | 0.76 (0.59,0.99)*    | 0.89 (0.69,1.14)                 | 0.66 (0.45,0.96)*  | 0.85 (0.58,1.26)  | 0.90 (0.60,1.36)                 |
| 46 to 60                        | 1.26 (1.07,1.48)*    | 1.41 (1.20,1.66)‡                | 1.52 (1.22,1.89)‡  | 1.49 (1.19,1.87)† | 1.28 (0.98,1.67)                 |
| >60                             | 1.40 (1.15,1.70)†    | 1.72 (1.42,2.07)‡                | 2.10 (1.64,2.69)‡  | 1.49 (1.19,1.87)† | 1.72 (1.27,2.33)‡                |
| Male recipient                  | 0.98 (0.87,1.09)     | 0.87 (0.78,0.97)*                | 0.93 (0.81,1.07)   | 0.93 (0.80,1.07)  | 1.02 (0.86,1.21)                 |
| Recipient race                  |                      |                                  |                    |                   |                                  |
| White                           | Reference            | Reference                        | Reference          | Reference         | Reference                        |
| Black                           | 0.69 (0.58,0.83)‡    | 0.66 (0.55,0.79)‡                | 0.69 (0.55,0.88)†  | 0.62 (0.49,0.80)‡ | 1.06 (0.81,1.38)                 |

|                                          | <b>Tac + MMF/MPA</b> | <b>Tac alone,<br/>Tac + Pred</b> | <b>mTORi-based</b> | <b>CsA-based</b>  | <b>Other ISx<br/>Maintenance</b> |
|------------------------------------------|----------------------|----------------------------------|--------------------|-------------------|----------------------------------|
| Hispanic                                 | 0.79 (0.67,0.94)*    | 0.72 (0.61,0.85)‡                | 0.61 (0.49,0.76)‡  | 0.78 (0.63,0.97)* | 0.79 (0.60,1.03)                 |
| Other                                    | 1.22 (0.96,1.56)     | 0.82 (0.65,1.05)                 | 0.94 (0.69,1.28)   | 0.78 (0.56,1.10)  | 0.85 (0.56,1.28)                 |
| <b>Body mass index, kg/m<sup>2</sup></b> |                      |                                  |                    |                   |                                  |
| <18.5                                    | 0.83 (0.57,1.22)     | 1.22 (0.86,1.74)                 | 0.98 (0.60,1.59)   | 1.29 (0.80,2.09)  | 1.24 (0.70,2.19)                 |
| 18.5 to 24.9                             | Reference            | Reference                        | Reference          | Reference         | Reference                        |
| 25 to 30                                 | 1.19 (1.04,1.36)*    | 1.23 (1.08,1.40)†                | 1.30 (1.10,1.54)*  | 1.14 (0.96,1.35)  | 1.29 (1.04,1.59)*                |
| >30                                      | 1.16 (1.01,1.33)*    | 1.15 (1.01,1.32)*                | 1.15 (0.97,1.38)   | 1.02 (0.85,1.22)  | 1.19 (0.96,1.48)                 |
| Unknown                                  | 1.32 (0.86,2.01)     | 0.91 (0.60,1.38)                 | 1.29 (0.78,2.13)   | 0.86 (0.47,1.58)  | 0.95 (0.50,1.79)                 |
| <b>Cause of ESLD</b>                     |                      |                                  |                    |                   |                                  |
| HCC                                      | 1.33 (1.07,1.65)*    | 1.51 (1.22,1.86)‡                | 2.15 (1.64,2.80)‡  | 1.49 (1.13,1.96)* | 1.03 (0.74,1.43)                 |
| HCV                                      | 1.23 (1.02,1.49)*    | 1.67 (1.39,2.01)‡                | 1.36 (1.07,1.74)*  | 2.16 (1.70,2.74)‡ | 1.07 (0.80,1.43)                 |
| HBV                                      | 1.07 (0.71,1.61)     | 1.48 (0.99,2.21)                 | 1.33 (0.80,2.22)   | 1.49 (0.88,2.52)  | 0.92 (0.48,1.77)                 |
| Metabolic                                | 0.87 (0.60,1.26)     | 1.00 (0.70,1.44)                 | 1.21 (0.76,1.93)   | 1.04 (0.63,1.70)  | 0.85 (0.47,1.52)                 |
| Alcoholic                                | Reference            | Reference                        | Reference          | Reference         | Reference                        |
| NASH                                     | 0.94 (0.73,1.20)     | 0.94 (0.73,1.21)                 | 1.06 (0.78,1.45)   | 1.02 (0.74,1.41)  | 0.85 (0.58,1.25)                 |
| Other                                    | 0.55 (0.46,0.66)‡    | 0.62 (0.52,0.74)‡                | 0.71 (0.57,0.90)*  | 0.58 (0.46,0.74)‡ | 0.63 (0.48,0.83)†                |
| <b>Recipient comorbidity</b>             |                      |                                  |                    |                   |                                  |
| Diabetes                                 | 1.20 (0.50,2.88)     | 0.72 (0.30,1.73)                 | 1.28 (0.43,3.79)   | 0.80 (0.26,2.46)  | 0.93 (0.23,3.67)                 |

|                                | <b>Tac + MMF/MPA</b> | <b>Tac alone,<br/>Tac + Pred</b> | <b>mTORi-based</b> | <b>CsA-based</b> | <b>Other ISx<br/>Maintenance</b> |
|--------------------------------|----------------------|----------------------------------|--------------------|------------------|----------------------------------|
| Coronary artery disease/Angina | 0.91 (0.61,1.37)     | 0.97 (0.66,1.44)                 | 0.77 (0.47,1.24)   | 0.72 (0.43,1.22) | 1.26 (0.73,2.18)                 |
| COPD                           | 0.95 (0.64,1.40)     | 0.70 (0.48,1.04)                 | 0.72 (0.43,1.21)   | 0.83 (0.50,1.37) | 0.67 (0.34,1.33)                 |
| Hypertension                   | 0.96 (0.83,1.10)     | 0.87 (0.75,1.00)*                | 0.94 (0.79,1.12)   | 0.90 (0.75,1.09) | 0.84 (0.67,1.05)                 |
| Cerebral vascular disease      | 0.84 (0.42,1.69)     | 1.05 (0.55,2.01)                 | 1.30 (0.57,2.95)   | 0.97 (0.42,2.23) | 1.21 (0.47,3.11)                 |
| Peripheral vascular disease    | 1.26 (0.69,2.29)     | 0.85 (0.46,1.56)                 | 0.41 (0.18,0.95)*  | 0.84 (0.39,1.77) | 1.09 (0.45,2.64)                 |
| Lab MELD score                 |                      |                                  |                    |                  |                                  |
| 0 to 9                         | Reference            | Reference                        | Reference          | Reference        | Reference                        |
| 10 to 14                       | 1.03 (0.89,1.19)     | 1.24 (1.07,1.43)*                | 1.14 (0.94,1.37)   | 0.96 (0.79,1.15) | 1.06 (0.85,1.33)                 |
| 15 to 19                       | 1.06 (0.88,1.27)     | 1.13 (0.95,1.35)                 | 1.20 (0.95,1.52)   | 0.98 (0.77,1.24) | 0.82 (0.61,1.10)                 |
| 20 to 24                       | 1.17 (0.94,1.45)     | 1.06 (0.85,1.30)                 | 1.29 (0.98,1.69)   | 0.97 (0.73,1.28) | 0.96 (0.69,1.35)                 |
| 25 to 29                       | 0.93 (0.74,1.18)     | 1.00 (0.79,1.25)                 | 1.09 (0.81,1.46)   | 0.80 (0.59,1.09) | 0.98 (0.68,1.41)                 |
| 30 to 34                       | 0.85 (0.65,1.11)     | 0.93 (0.72,1.20)                 | 0.93 (0.65,1.31)   | 0.92 (0.65,1.29) | 1.26 (0.87,1.84)                 |
| 35 to 39                       | 0.99 (0.75,1.31)     | 0.96 (0.72,1.27)                 | 1.29 (0.91,1.84)   | 0.97 (0.67,1.40) | 0.92 (0.58,1.44)                 |
| Primary insurance source       |                      |                                  |                    |                  |                                  |
| Private                        | 1.26 (1.12,1.41)‡    | 1.12 (1.00,1.25)                 | 1.11 (0.96,1.28)   | 1.05 (0.91,1.22) | 1.10 (0.92,1.32)                 |
| Public                         | Reference            | Reference                        | Reference          | Reference        | Reference                        |
| Self/Other                     | 0.87 (0.40,1.88)     | 1.71 (0.90,3.25)                 | 1.15 (0.52,2.52)   | 0.54 (0.18,1.68) | 1.45 (0.55,3.79)                 |

|                                                 | <b>Tac + MMF/MPA</b> | <b>Tac alone,<br/>Tac + Pred</b> | <b>mTORi-based</b> | <b>CsA-based</b>  | <b>Other ISx<br/>Maintenance</b> |
|-------------------------------------------------|----------------------|----------------------------------|--------------------|-------------------|----------------------------------|
| <b>Donor and transplant factors</b>             |                      |                                  |                    |                   |                                  |
| Donor risk index                                | Reference            | Reference                        | Reference          | Reference         | Reference                        |
| 0 to <1.5                                       | 0.95 (0.84,1.09)     | 0.93 (0.82,1.05)                 | 0.91 (0.78,1.08)   | 1.00 (0.85,1.19)  | 1.13 (0.93,1.39)                 |
| 1.5 to <2.0                                     | 0.87 (0.74,1.02)     | 0.99 (0.84,1.15)                 | 0.90 (0.74,1.10)   | 1.01 (0.82,1.24)  | 1.01 (0.79,1.30)                 |
| 2.0 to <2.5                                     | 0.98 (0.79,1.22)     | 0.87 (0.71,1.08)                 | 0.77 (0.58,1.02)   | 0.86 (0.65,1.14)  | 0.92 (0.65,1.31)                 |
| >=2.5                                           | 0.85 (0.63,1.14)     | 0.94 (0.71,1.25)                 | 0.61 (0.40,0.93)*  | 0.60 (0.40,0.90)* | 1.49 (0.97,2.28)                 |
| LVD                                             | Reference            | Reference                        | Reference          | Reference         | Reference                        |
| Previous transplant                             | 0.57 (0.47,0.70)‡    | 0.78 (0.65,0.93)*                | 0.69 (0.53,0.88)*  | 0.92 (0.72,1.18)  | 0.84 (0.62,1.13)                 |
| eGFR at discharge                               |                      |                                  |                    |                   |                                  |
| >=90                                            | Reference            | Reference                        | Reference          | Reference         | Reference                        |
| 60 to 89                                        | 0.99 (0.85,1.15)     | 0.98 (0.85,1.14)                 | 0.78 (0.64,0.95)*  | 1.11 (0.90,1.36)  | 1.09 (0.86,1.38)                 |
| 30 to 59                                        | 0.84 (0.71,0.99)*    | 0.81 (0.69,0.95)*                | 1.13 (0.93,1.38)   | 1.24 (1.00,1.53)  | 0.97 (0.75,1.25)                 |
| 0 to 29                                         | 0.67 (0.50,0.89)*    | 0.72 (0.54,0.95)*                | 1.98 (1.44,2.72)‡  | 1.50 (1.07,2.10)* | 0.88 (0.57,1.36)                 |
| Missing                                         | 0.83 (0.56,1.23)     | 0.90 (0.63,1.31)                 | 0.93 (0.57,1.52)   | 1.28 (0.78,2.10)  | 1.22 (0.67,2.20)                 |
| Function status at 6 months<br>after transplant |                      |                                  |                    |                   |                                  |
| Severe impairment                               | 0.62 (0.39,0.99)*    | 1.18 (0.77,1.80)                 | 1.03 (0.62,1.70)   | 1.96 (1.25,3.09)* | 0.96 (0.50,1.82)                 |
| Moderate impairment                             | 0.68 (0.53,0.86)     | 1.07 (0.85,1.35)                 | 1.20 (0.91,1.58)   | 1.33 (1.01,1.74)* | 1.03 (0.73,1.46)                 |

|                                      | <b>Tac + MMF/MPA</b> | <b>Tac alone,<br/>Tac + Pred</b> | <b>mTORi-based</b> | <b>CsA-based</b>  | <b>Other ISx<br/>Maintenance</b> |
|--------------------------------------|----------------------|----------------------------------|--------------------|-------------------|----------------------------------|
| Mild impairment                      | Reference            | Reference                        | Reference          | Reference         | Reference                        |
| Unknown                              | 0.94 (0.77,1.16)     | 0.98 (0.80,1.20)                 | 0.88 (0.67,1.15)   | 0.95 (0.72,1.24)  | 0.91 (0.66,1.27)                 |
| Baseline malignancy                  | 1.04 (0.90,1.21)     | 0.99 (0.86,1.15)                 | 1.18 (0.99,1.42)   | 0.91 (0.75,1.10)  | 1.03 (0.81,1.30)                 |
| Malignancy incident through 6 months | 0.83 (0.42,1.63)     | 1.59 (0.88,2.88)                 | 6.07 (3.26,11.27)‡ | 1.69 (0.80,3.56)  | 1.83 (0.75,4.43)                 |
| Acute reject at 6 months             | 0.32 (0.26,0.38)‡    | 0.33 (0.27,0.39)‡                | 0.72 (0.58,0.89)*  | 0.49 (0.39,0.62)‡ | 0.64 (0.48,0.84)†                |
| Transplant year                      |                      |                                  |                    |                   |                                  |
| 2006 to 2009                         | Reference            | Reference                        | Reference          | Reference         | Reference                        |
| 2010 to 2012                         | 1.01 (0.86,1.20)     | 0.84 (0.72,0.99)*                | 0.80 (0.66,0.98)*  | 1.00 (0.81,1.23)  | 0.86 (0.68,1.09)                 |
| 2013 to 2014                         | 1.01 (0.85,1.20)     | 0.75 (0.63,0.88)†                | 0.88 (0.71,1.09)   | 0.68 (0.54,0.85)† | 0.52 (0.40,0.68)‡                |

P-values: \*  $0.02 \leq p < 0.05$ ; †  $0.0001 \leq p < 0.01$ ; ‡  $p < 0.0001$

Abbreviations: AZA, azathioprine; BMI, body mass index; CsA, cyclosporine; eGFR, estimated glomerular filtration rate; HCC, hepatocellular carcinoma; HCV, hepatitis C virus; HBV, hepatitis B virus; COPD, chronic obstructive pulmonary disease, LVD, living donor; mTOR: mammalian target of rapamycin inhibitor; MMF/MPA, mycophenolate acid; NASH, non-alcoholic steatohepatitis; Pred, prednisone SRL, Sirolimus; Tac, Tacrolimus.
